# Supplementary material for: A strategy for boosting the thermoelectric performance of famatinite Cu3SbS4
Source: Royal Society of Chemistry journal article supplement (doi:10.1039/c9cp06233e), 2019-12-30
Supplement: c9cp06233e1.pdf [file c9cp06233e1.pdf]

## Electronic Supplementary Information

### A Strategy for Boosting Thermoelectric Performance of Famatinite $\text{Cu}_3\text{SbS}_4$

Taiki Tanishita,<sup>a</sup> Koichiro Suekuni,<sup>\*a,b</sup> Hirotaka Nishiata,<sup>c</sup> Chul-Ho Lee,<sup>c</sup> Michitaka Ohtaki,<sup>a,b</sup>

<sup>a</sup>Department of Applied Science for Electronics and Materials,  
Interdisciplinary Graduate School of Engineering Sciences,  
Kyushu University, Kasuga, Fukuoka 816-8580, Japan

<sup>b</sup>Transdisciplinary Research and Education Center for Green Technologies,  
Kyushu University, Kasuga, Fukuoka 816-8580, Japan

<sup>c</sup>Research Institute for Energy Conservation,  
National Institute of Advanced Industrial Science and Technology (AIST),  
Tsukuba, Ibaraki 305-8568, Japan

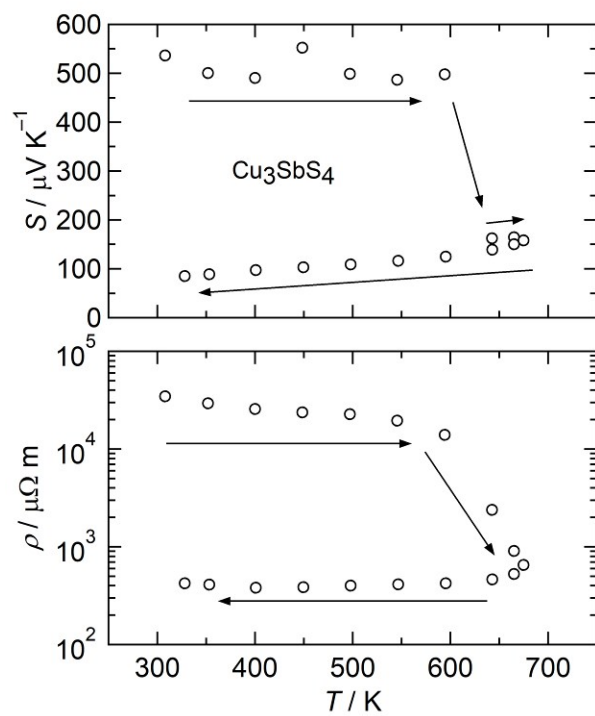

Fig. S1 Temperature dependence of Seebeck coefficient  $S$  and electrical resistivity  $\rho$  for the sample of  $\text{Cu}_3\text{SbS}_4$ .  $S$  and  $\rho$  showed drops above 600 K.

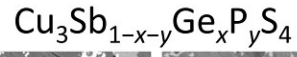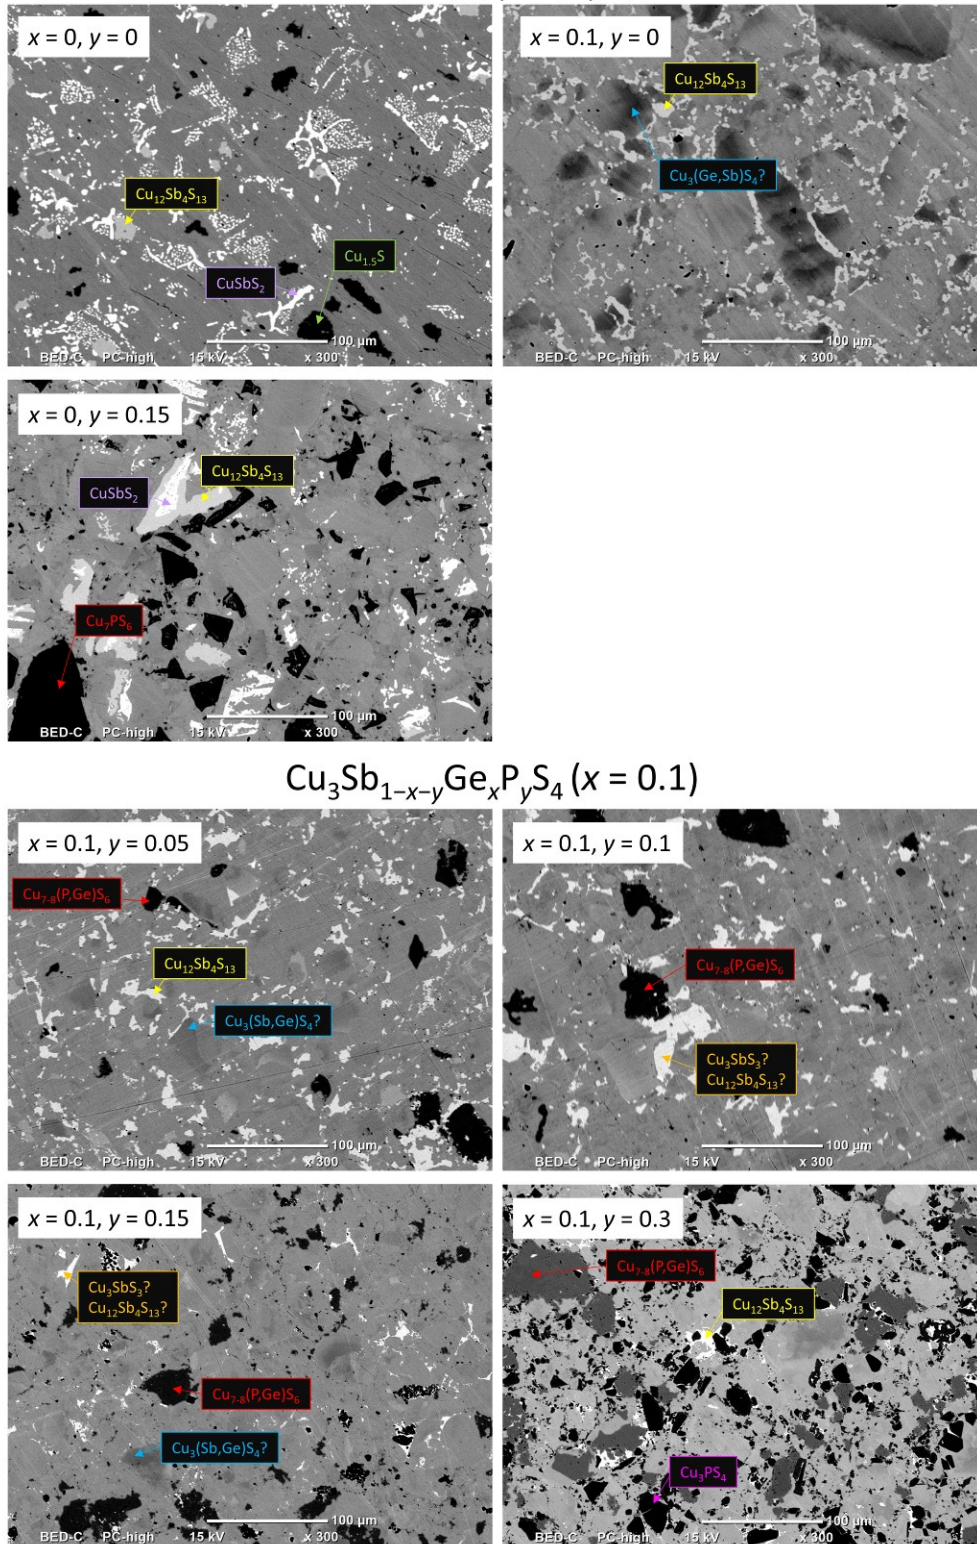

Fig. S2. Backscattered electron images for the samples of  $\text{Cu}_3\text{Sb}_{1-x-y}\text{Ge}_x\text{P}_y\text{S}_4$ .

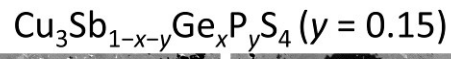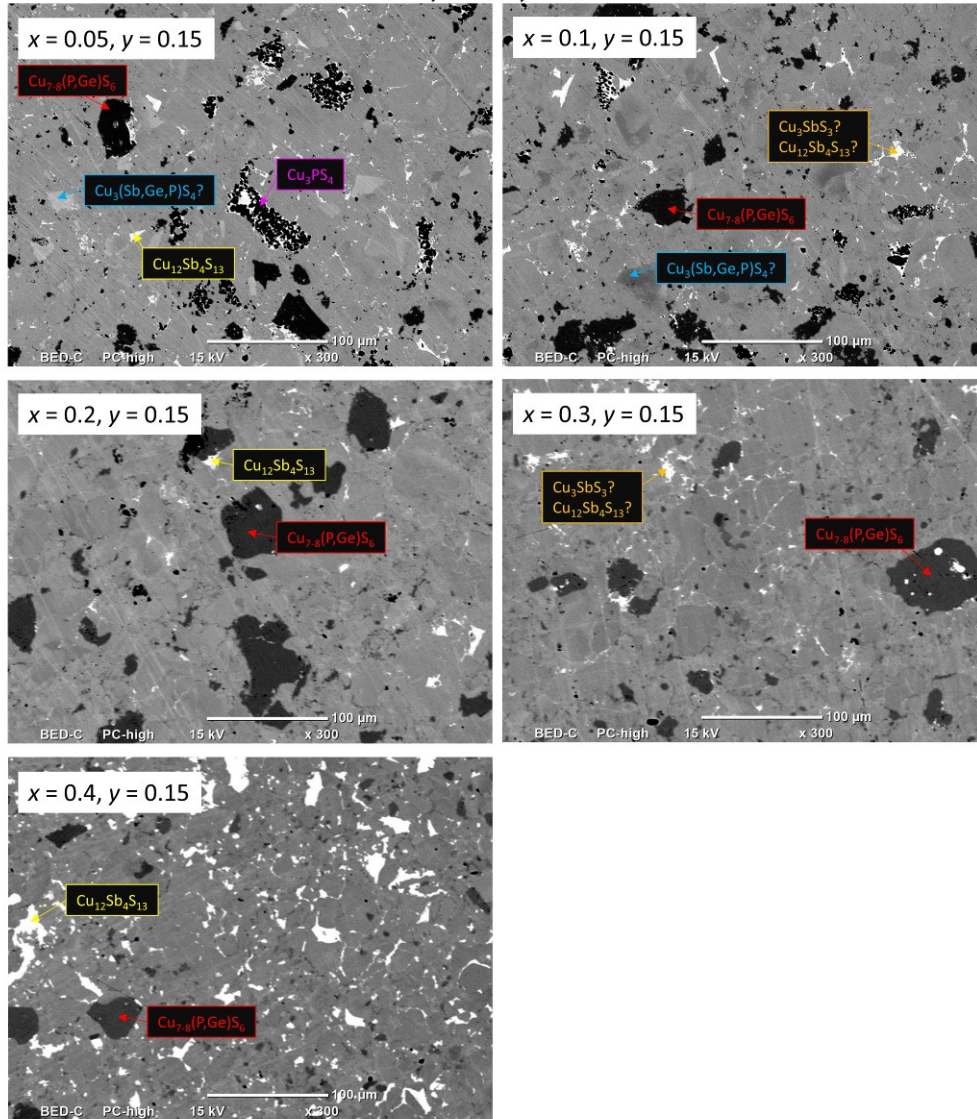

Fig. S2. Continued.

Table S1. Lattice parameters,  $a$  and  $c$ ,  $c/a$  ratio, and the chemical compositions of famatinites  $\text{Cu}_3\text{Sb}_{1-x-y}\text{Ge}_x\text{P}_y\text{S}_4$ .

The chemical compositions were calculated by assuming the sum of the composition of cation (Cu, Sb, Ge, and P) as being 4. The standard deviation of the composition is given in the parentheses.

| $x$  | $y$  | $a / \text{Å}$ | $c / \text{Å}$ | $c/a$ | Cu      | Sb      | Ge      | P       | S       |
|------|------|----------------|----------------|-------|---------|---------|---------|---------|---------|
| 0    | 0    | 5.386          | 10.751         | 1.996 | 2.96(2) | 1.04(2) | —       | —       | 3.76(4) |
| 0.1  | 0.05 | 5.366          | 10.701         | 1.994 | 2.99(3) | 0.88(2) | 0.09(3) | 0.04(2) | 3.65(5) |
| 0.1  | 0.1  | 5.360          | 10.683         | 1.993 | 3.00(3) | 0.83(3) | 0.09(4) | 0.08(2) | 3.61(4) |
| 0.1  | 0.15 | 5.353          | 10.660         | 1.991 | 2.97(3) | 0.81(2) | 0.09(3) | 0.13(1) | 3.68(4) |
| 0.1  | 0.3  | 5.349          | 10.651         | 1.991 | 2.97(2) | 0.78(5) | 0.11(5) | 0.15(3) | 3.73(8) |
| 0    | 0.15 | 5.382          | 10.734         | 1.994 | 2.96(1) | 1.00(3) | —       | 0.04(3) | 3.73(4) |
| 0.05 | 0.15 | 5.362          | 10.678         | 1.992 | 2.98(2) | 0.85(2) | 0.04(2) | 0.12(2) | 3.68(5) |
| 0.1  | 0.15 | 5.353          | 10.660         | 1.991 | 2.97(3) | 0.81(2) | 0.09(3) | 0.13(1) | 3.68(4) |
| 0.2  | 0.15 | 5.337          | 10.625         | 1.991 | 2.98(3) | 0.67(3) | 0.20(4) | 0.15(2) | 3.72(4) |
| 0.3  | 0.15 | 5.326          | 10.597         | 1.990 | 2.99(3) | 0.56(4) | 0.31(5) | 0.15(3) | 3.66(7) |
| 0.4  | 0.15 | 5.320          | 10.576         | 1.988 | 2.98(5) | 0.51(3) | 0.38(5) | 0.13(1) | 3.71(6) |
